1 Title: A novel culture-independent method to search unknown dominant  
2 bacterial groups and its application to microbial analysis of membrane  
3 bioreactors.

4 Running title: A novel culture-independent enumeration method.

5 Byline: Katsuji Watanabe, and Naoto Horinishi

6 Affiliation line: Department of Life, Environment and Applied Chemistry, Graduate School of  
7 Engineering, Fukuoka Institute of Technology, Fukuoka, Japan

8

9 Corresponding author: Katsuji Watanabe, E-mail:k-watanabe@fit.ac.jp

10

11 Key words: culture-independent method, numerically dominant bacteria, membrane bioreactor

12

13 **ABSTRACT**

14 As we could not get numerical information for unknown unculturable microorganisms through  
15 conventional culture-independent analysis methods such as next-generation sequencing, or real time  
16 PCR, we developed an original culture-independent method, and searched the numerically dominant  
17 bacteria in three industrial membrane bioreactors for livestock farms.

18 Although *Actinobacteria* was the numerically dominant phylum ( $9.3 \times 10^5$  MPN/mL) on  
19 6/August/2014 in the MBR of A farm, when a bacteria with the same genotype to *Arthrobacter* sp.  
20 (AF197047;  $4.3 \times 10^5$  MPN/mL), and those similar to *Burkholderia* sp. (AB299593;  $4.3 \times 10^5$  MPN/mL)  
21 were the numerically dominant, after about 13 months (24/October/2015) a number of the  
22 *Arthrobacter* genotype increased to  $930 \times 10^5$  MPN (230 times) and become dominant, and those  
23 similar to the *Microbacterium* sp. (AM403628) increased to  $92 \times 10^5$  MPN, while that of the  
24 *Burkholderia* genotype disappeared. In the other MBR of B farm, bacteria having a similar genotype  
25 to *Enshifer* sp. (AB195268, CP000738), or *Shinorhizobium* sp. (AF227755, AB195268), or  
26 *Mesorhizobium* sp. (BA000012, Mso.tians29), or *Agrobacterium vitis* (D12795) was dominant on  
27 18/August/2015 ( $24 \times 10^5$  MPN) and 30/August/2015 ( $15.5 \times 10^5$  MPN). In the other MBR of C farm  
28 (9/October/2015), bacteria having a similar genotype to uncultured *Betaproteobacteria* (AY921864)  
29 was dominant ( $430 \times 10^5$  MPN), followed by uncultured bacterium ( $74 \times 10^5$  MPN ; AM268745), and  
30 *Mycobacteriaceae* (AB298730), or *Propionibacteriaceae* (AB298731) ( $7.4 \times 10^5$  MPN). There was no  
31 common bacterial groups among tested three MBRs. Present results indicated that different kinds of

32 homogeneous bacteria were numerically dominant in the three tested membrane bioreactors, where  
33 their numbers and ratios were varied with the duration of the driving periods.

#### 34 **IMPORTANCE**

35 Although the conventional molecular-based culture independent methods have been used in  
36 place of traditional culture-based methods for microbiological research and expanded information of  
37 unculturable low-abundance bacterial groups, not all of them were always highly active in the  
38 environment and it was difficult to search for microorganisms among them which were highly active  
39 and play an important role in the environment. As numerical data of each bacteria might become an  
40 important index to know their activity in environment, we had created a novel culture-independent  
41 enumeration method for numerically dominant unidentified bacteria. Through the method, we found  
42 that different kinds of homogeneous bacteria were numerically dominant in the three tested  
43 membrane bioreactors, whose numbers were high enough to affect the performance of the reactor as  
44 a single strain. The method was found useful to specify and trace unknown numerically dominant  
45 bacterial groups in a culture independent manner.

46

47

## 48 INTRODUCTION

49       Until now, the unculturability of microorganisms was reported to be caused from the following  
50 different factors: artificial ones caused by unknown suitable growth condition such as cases in  
51 filamentous bacteria in activated sludge (1, 2), or *Dehalococcoides* sp. in soil (3), intrinsic ones  
52 caused from low-abundance, and slow growing environmental microorganisms, such as rare  
53 biosphere (4, 5), and acquired ones caused from a dormancy state of culturable bacteria (6-10).

54       As most environmental bacteria were unculturable in growth media, over the past two decades,  
55 molecular-based culture independent methods have been used in place of traditional culture-based  
56 methods (11, 12), and has expanded information of unculturable bacterial groups in environments  
57 (13). In particular, next-generation sequencing (NSG) was expected to become a powerful tool not  
58 only to provide genetic information of all the low-abundance microorganisms but also to relate them  
59 to their various functions (14).

60       Among environmental samples, biological wastewater treatment reactors have been widely been  
61 studied by using them, based on the social demand that the reactor was an essential facility to purify  
62 water by removing excess organics, nitrogen, phosphorus and pathogenic microorganisms in  
63 wastewater (15), and that their microbial complex community primarily affected the performance of  
64 reactors (16, 17).

65       As for conventional activated sludge (CAS) equipped with final settling tanks for solid-liquid

66 separation, the culture independent methods such as clone library sequencing (18), denaturing  
67 gradient gel electrophoresis (DGGE) (19, 20), terminal restriction fragment polymorphisms analysis  
68 (21-23), fluorescence in situ hybridization (FISH) (24, 25), microarray-based genomics (26), and  
69 NGS (27-32) have been used to clarify bacterial relation to their performance. These methods have  
70 also been used for membrane bioreactor (MBR), by which solids and liquids could be completely  
71 separated through a membrane, was an increasingly implemented technology because of advantages  
72 such as reduced excess sludge, higher effluent quality and operation under higher biomass  
73 concentrations over CAS (23, 24, 30).

74 Most reports have focused mainly on the comparative study of overall microbial composition (23,  
75 26-28, 32), and their changes in the reactor (29, 30). With respect to the well-known specific gene, or  
76 bacteria, their numbers were estimated by using real-time PCR (33-35), or by FISH (24, 25). There  
77 have been few reports to show whether numerically dominant specific microorganisms, which might  
78 affect the performance of the reactor, existed in the reactor or not until now (1, 2). Higher biomass in  
79 effluent, and higher performance of the reactors (16, 20, 22-24, 27, 28, 30, 31) implied that the  
80 unculturability of microorganisms in the reactor might mainly be caused from unknown growth  
81 condition, and not by low-abundance and slow growing microorganisms, nor by dormant cell.

82 As microbial numbers might become a simple and useful index to show bacterial activity in the  
83 environment, the author has developed an original method to specify and trace unknown dominant

84 microorganisms, in which taxonomies of each bacterial groups were elucidated from the multiple  
85 enzyme restriction fragment length polymorphism (MERFLP) of 16S rDNA (36, 37), and each  
86 number of the bacterial groups were estimated by most probable number (MPN) (38). Although the  
87 method had mostly been applied as a culture-based method (39-43), we presented the results of our  
88 application as culture-independent analyses of three industrial membrane bioreactors (MBR) situated  
89 in the Hokkaido area. The results were compared with those by the culture-based same method, and  
90 those by culture-independent PCR-DGGE.

91

## 92 **MATERIALS AND METHODS**

93 **Samples.** The three industrial MBR had been constructed by BICOM Co.Ltd. (Osaka, Japan) to  
94 purify and clean up wastewater from daily farms. All the samples were collected from equalizing  
95 tanks before septic tanks having an immersion-type membrane filtration apparatus. Sludge in MBR  
96 of A farm (Yubetsu Town in Monbetsu-Gun Hokkaido) was sampled on 6/August/2014 and  
97 24/October/2015. That of B farm (Tsurui Village in Akan-Gun Hokkaido) was sampled on 18/  
98 August /2014 and 30/August/2014. That of C farm (Onbetsu Town in Kushiro Branch Office,  
99 Hokkaido) was sampled on 9/October/2015. Except for the MBR of A farm on 6/August/2014, when  
100 a large amount of waste milk flowed into the MBR because of epidemic bovine mastitis and the  
101 performance of the MBR became lower, the total performance of purifying and cleaning up

102 wastewater was kept in good condition.

103 **Culture-independent MPN and culture based MPN.** For culture-independent MPN, DNA  
104 was extracted from samples (10mL fresh wt.) as described previously (36) after mixing in a 15 mL  
105 Falcon tube (215rpm, 20min). After purification by conventional methods, the DNA solution was  
106 further purified using a GenElute Agarose Spin Column (SIGMA). Serial 10-fold dilutions ( $10^{-2}$  to  
107  $10^{-9}$ ) were prepared from the DNA solution.

108 For culture-based MPN, serial 10-fold dilutions ( $10^{-2}$  to  $10^{-9}$ ) prepared from samples (1mL fresh  
109 wt.) were inoculated to test vials (three replicates), including lactose broth (Difco, Sparks MD). After  
110 three days incubation at 30°C, bacterial DNA in each vial was extracted as described previously and  
111 purified by conventional methods (36, 37).

112 **MERFLP of the amplified 16S rDNA.** Using the V2 forward primer (41f), and the V6 reverse  
113 primer (1066r) (44), 16S rDNA was amplified, as described previously (36, 37). Their restriction  
114 fragment lengths were measured by microchip electrophoresis systems (MCE-202 MultiNA;  
115 Shimadzu Co., Ltd. Kyoto, Japan) after digestion of the PCR product (10 $\mu$ l) using each of the  
116 following 4 restriction enzymes: *Hae*III or *Hha* I or *Rsa* I or *Alu* I (10 units, Takara Bio Co. Ltd.  
117 Shiga, Japan) in buffer solution (10xLow salt buffer, Takara Bio Co. Ltd.) and 5 folds dilution by  
118 de-ionized water, as described previously (36-43).

119 **Reference database used for the phylogenetic estimation.** The reference database used for

120 this research included 30,844 post-amplification sequence files for the 41f/1066r primers, which  
121 were mainly re-edited from small subunit rRNA files in RDP II release 9\_61 (45) under 5 - bases  
122 mismatches in the both in primer annealing sites (36, 37), and consisted of 1,379 bacterial genera,  
123 including uncultured and unidentified bacteria (40-43) .

124 **Data processing for multi-template DNA and phylogenetic estimation.** As each MPN vial  
125 included multi-template DNAs originating from heterogeneous bacteria, the measured MERFL  
126 digested from the homogeneous 16S rDNA was selected among the mixed MERFLs digested from  
127 the heterogeneous 16S rDNA, as described previously (36, 37). All the theoretical MERFLs  
128 originated from the homogeneous 16S rDNA sequence data. The major restriction fragments (RFs)  
129 (represented as H in Table 1-3) were those with the highest relative mole concentration (ratio of  
130 fluorescent intensity to fragment size). After subtraction of the major RFs from the mixed  
131 heterogeneous RFs, the 2nd major RFs were similarly selected (represented as M in Table 1-3). After  
132 subtraction of the second major RFs from the remaining heterogeneous RFs, the 3rd major RFs were  
133 similarly selected (represented as L in Table 1-3). The similarity between the measured RFLP (A)  
134 and the reference RFLP (B) was calculated as described previously (36-43), based on the pairwise  
135 distance ( $D_{AB}$ ) according to Nei and Li (46). The pairwise distance of the MERFLPs ( $D_{ABME}$ ) was an  
136 average of all the  $D_{ABs}$  for used restriction enzymes. Similarity (%) was  $(1-D_{ABME}) \times 100$  (Table 1-3).  
137 In the phylogenetic estimation, combinations of the three restriction enzymes were used when the



138 identical theoretical MERFL (100% similarity) was not found using the four restriction enzymes.  
139 When the identical theoretical MERFL was not found using three restriction enzymes, combinations  
140 of the two restriction enzymes was used. If the identical theoretical MERFL (100% similarity) was  
141 not found using the two restriction enzymes, the theoretical MERFL having the highest similarity  
142 (over 90% ) to the measured MERFL was indicated in most cases (Table 1-3) (38-43).

143 **Enumeration of bacterial groups by MPN.** Through a three-tube, three-decimal-dilution  
144 experiment, MPNs of each bacterial groups were estimated (Table 4-6). Using FDA's Bacterial  
145 Analytical Manual (47), confidence limits were obtained and shown in the Tables. Confidence limits  
146 shown in Table 4-6 were obtained using Woodward's method (48), except for the  
147 culture-independent MPN in B farm on 30/August/2014, when we could not obtain the data of a  $10^{-5}$   
148 dilution sample, and a  $10^{-6}$  dilution sample.

149 **PCR- DGGE.** F984GC corresponding to positions 968–984 in *E.coli* 16S rRNA (49), and  
150 R1378 corresponding to positions 1379-1401 were used as PCR primers (50). The PCR profile  
151 consisted of a 2 min denaturation at 94°C, and 30 cycles of 30 sec denaturation at 94°C, a 1 min  
152 annealing at 55°C, and a 1 min extension at 72°C, followed by a 3 min extension at 72°C.  
153 Amplicons, which were checked by agarose gel electrophoresis, were analyzed by DGGE using a  
154 Bio-Rad DCodeTMs system (Bio-Rad Laboratories, Hercules, CA, USA) according to the  
155 manufacture's manual, as described in the report (51).

156

## 157 RESULTS

158 **Culture independent analysis.** There was not so large a difference among three replicate  
159 electropherograms, which indicated higher reproducibility of the method (Fig. 1). The band strength  
160 of the most RFs had gradually decreased in correlation with dilutions, which suggested each of the  
161 bacterial numbers could be estimated by MPN (Fig. 1).

162 The total detected bacterial number amplified by the 41f/1066r primers was  $24 \times 10^5$  MPN/mL for  
163 MBR in A farm on 6/August/2014. A numerically dominant phylum was *Actinobacteria*  
164 ( $9.3 \times 10^5$  MPN) (Table 1, Table 4), where a homogeneous bacteria with the same MERFLP to  
165 *Arthrobacter* sp. (AF197047) was one that was numerically dominant ( $4.3 \times 10^5$  MPN), and that which  
166 was similar in MERFLP to *Burkholderia* sp. (AB299593) was the other ( $4.3 \times 10^5$  MPN) (Table 1, 6).  
167 After about 13 months (24/October/2015), the total detected bacterial numbers increased to 100  
168 times ( $2400 \times 10^5$  MPN/mL) (Table 1, Table 4). All of them were *Actinobacteria*, where those with the  
169 *Arthrobacter* sp. genotype were also the numerically dominant ( $930 \times 10^5$  MPN), followed by those  
170 with a similar MERFLP to *Microbacterium* sp. (AM403628) ( $92 \times 10^5$  MPN), and those with a  
171 *Burkholderia* genotype disappeared (Table 1, Table 4). These results suggested that an increase of  
172 the total detected bacteria number during 13 months was caused by a proliferation of *Actinobacteria*,  
173 such as the *Arthrobacter* genotype (230 times) and the *Microbacterium* genotype (Fig. 2).

174 The total detected bacterial number was  $46 \times 10^5$  MPN in the other MBR of B farm on  
175 18/August/2015 (Table 5). A numerically dominant phylum was *Proteobacteria*, in which a  
176 homogeneous bacteria with a similar MERFLP to *Alphaproteobacteria*, such as *Ensifer*  
177 sp.(CP000738,D14509,D14516), or *Shinorhizobium* sp.(Srh.fredi5, Srh.melil7), or *Mesorhizobium*  
178 sp.(BA000012, Mso.tians2), or *Agrobacterium vitis* (D12795) was numerically dominant  
179 ( $24 \times 10^5$  MPN (Table 2, Table 5)). After 12 days (30/August/2015), the total detected bacterial  
180 numbers decreased to  $24 \times 10^5$  MPN/mL (Fig. 2). Although those with the *Alphaproteobacteria*  
181 genotype were also numerically dominant, its number decreased to  $15.5 \times 10^5$  MPN, and a number of  
182 bacteria having a similar MERFLP to *Haloanaerobacter chitinovorans* (U32596) increased  
183 ( $4.1 \times 10^5$  MPN) (Table 2, Table 5). The result implied that a decrease of the total number of detected  
184 bacteria might be caused by a decrease of the numerically dominant *Alphaproteobacteria* genotype  
185 (Fig. 2).

186 The total number of detected bacterial amplified by the 41f/1066r primers was  $930 \times 10^5$  MPN in the  
187 other MBR of C farm on 9/October/2015 (Table 3, 6). A numerically dominant phylum was  
188 *Proteobacteria*, in which a homogeneous bacteria having a similar MERFLP to uncultured  
189 *Betaproteobacteria* (AY921864) was numerically dominant ( $430 \times 10^5$  MPN), followed by  
190 uncultured bacterium ( $74 \times 10^5$  MPN; AM268745), *Mycobacteriaceae* (AB298730), or  
191 *Propionibacteriaceae* bacterium ( $7.4 \times 10^5$  MPNA; B298731), *Streptiverticillium baldaccii* (6.2

192  $10^5$ MPNA; X53164, X53169), and *Lactobacillus fermentum* ( $1.5 \times 10^5$ MPN; DQ208931,  
193 *L.fermentm*) (Table 3, 6). There was no bacteria with the same MERFLP among the three tested  
194 MBRs, which implied that the three MBRs had a different bacterial consortium (Fig. 2).

195 **Comparison to culture-independent PCR-DGGE.** There was not such a large difference among  
196 three replicate DGGE profiles, which indicated a higher reproducibility of the method (Fig.3, Fig.4).  
197 The strength of each bands had gradually decreased in correlation with dilutions, which suggested  
198 the numbers of each bands could be estimated by MPN (Fig.3, Fig.4). DGGE profile of MBR in A  
199 farm on 6/August/2014 indicated the existence of the two numerically dominant bacteria (B1, and  
200 C1), and two subdominant bacterial groups (A1, and D1) (Fig.3). Numbers of B1 and C1 were  
201 estimated to be over  $11 \times 10^5$ MPN, and those of A1 and D1 were  $2.3 \times 10^5$ MPN (Fig.3). The DGGE  
202 profile of MBR in A farm on 24/October/2015 indicated the existence of one numerically dominant  
203 bacteria (E2), a subdominant bacteria (D2), and the three bacterial groups (A2, B2, and C2) (Fig.4).  
204 The number of E2 was estimated to be over  $11,000 \times 10^5$ MPN, with that of D2 being  $2,300 \times 10^5$ MPN.  
205 Those of A2, B2, and C2 were  $230 \times 10^5$ ,  $230 \times 10^5$ , and  $23 \times 10^5$ , respectively (Fig.4).

206 **Comparison to culture-based MPN.** As there was a large difference among three replicate  
207 electropherograms, this indicated poor reproducibility of the method. Most of the restriction  
208 fragments had not always disappeared in correlation with dilutions, which suggested each bacterial  
209 number could not precisely be estimated by MPN.

210 A total detected bacterial number amplified by the 41f/1066r primers was over  $110 \times 10^8$  MPN/mL  
211 for MBR in farm A on 6/August/2014 (Table 4), and that of farm B on 24/October/2015 was  
212  $46 \times 10^8$  MPN/mL (Table 5). However, the numbers of total bacteria, and the numerical dominant for  
213 MBR in farm C on 9/October/2015 were underestimated because the bacterial numbers scaled out of  
214 the detection range of the MPN. A total detected bacterial number was over  $1.1 \times 10^8$  MPN/mL (Table  
215 6). There were no common MERFLPs between those of the culture independent method and the  
216 culture-based method (Fig. 2).

217

## 218 DISCUSSION

219 All the results of culture-independent MPN indicated that each sample included a homogeneous  
220 MERFP (Table 1-Table 3) originated from a single strain (Table 4-Table 6), whose numbers were  
221 high enough to affect performance of the reactor (33). However the total number of the detected  
222 bacteria was lower than those by the culture-based MPN (Table 4-Table 6), and those by the other  
223 reports (16, 33).

224 The lower bacterial number by the culture-independent MPN was attributed to the elimination of  
225 low-abundance bacteria with huge diversity, as the following. There were smeared bands in DGGE  
226 profiles lower than  $10^{-4}$  dilution in Figure 3, and lower than  $10^{-6}$  dilution in Figure 4, which were un-  
227 enumerable diverse kinds of 16S rDNA from low-abundance bacteria, such as rare biosphere (4, 5,

228 19). They were eliminated from the total bacterial count by our culture independent MPN.

229 In culture-based MPN, some of such low-abundance bacteria occasionally proliferated in the LB  
230 medium, which resulted in the higher total bacterial count (Table 4-6) comparable to those of the  
231 reported bacterial numbers (16, 33). However, such an occasional proliferation resulted in incubation  
232 bias and poor reproducibility for composition analysis (11, 12), and resulted in a non-detection of the  
233 numerically dominant bacteria. LB medium was not suitable for the numerically dominant bacteria  
234 in the MBRs. By using growth media suitable for target microorganisms (40, 42), or those which  
235 required higher selection bias, such as multi-drug resistant bacteria (38, 43), the culture-based MPN  
236 afforded reproducible results.

237 The results of culture-independent DGGE were well consistent with those of culture-independent  
238 MPN. The two numerically dominant bacteria (B1, and C1) in the DGGE profile (Fig.3) were  
239 supposed to be the *Arthrobacter* genotype and the *Burkholderia* genotype. The one numerically  
240 dominant bacteria (E2) in the DGGE profile (Fig.4) was supposed to be the *Arthrobacter* genotype,  
241 and the subdominant bacteria (D2) was supposed to be the *Microbacterium* genotype (Fig.4).

242 Estimated numbers of each identified bacterial groups by our method were lower than those  
243 estimated from band patterns in DGGE profiles. Because short RF that originated from higher  
244 dilution samples only had lower intensity, it became difficult to select the RFs that originated from  
245 homogeneous 16S rDNA precisely, which lowered similarity in the similarity search by MERFLP.

246 Although the highest number of the *Arthrobacter* genotype was estimated to be  $930 \times 10^5$  MPN/mL  
247 by MERFLP/MPN in the MBR for A farm on 24/October/2015 (Table 4), its number might be  
248 underestimated and estimated to be over  $11,000 \times 10^5$  MPN mL by DGGE/MPN (Fig. 4), which is  
249 comparable to the reported total bacteria number in the CAS (from  $10,100 \times 10^5$  to  
250  $80,000 \times 10^5$  cell/mL) (16, 33). The numerically dominant bacteria might primarily influence the  
251 performance of the MBR as a single strain.

252 Although we could not get any information about low-abundance bacteria by our method, the  
253 method was found to be effective in specifying and tracing the numerically dominant bacterial  
254 groups in the tested three MBRs. This is because precise and reproducible phylogenetic affiliation  
255 was possible with respect to the major bacterial groups in higher dilution DNA, where MERFLPs  
256 originated from almost a single isolated strain.

257 As far as CAS reactors, Xia et al. suggested that all the reactors contained a core of bacterial  
258 phylum with almost identical compositions, where *Proteobacteria* was the largest phylum and  
259 *Firmicutes*, *Actinobacteria*, and *Bacteroidetes* were the subdominant phylum in five CAS reactors  
260 (26). In contrast, Takada et al. reported that there was no core of bacterial phylum or similar  
261 phylogenetic structure among 12 different MBRs (23). Our present results, that there was no  
262 common numerically dominant bacterial groups in the tested three MBR reactors, was consistent  
263 with the latter results (Fig. 2). Our other results, that the composition of overall classes was not

264 changed between sampling periods, was also consistent with those by the other conventional  
265 techniques (29, 30) (Fig. 2).

266 As a new finding through our method, which has not been reported by the other conventional  
267 techniques (23, 26-30, 32), the present results indicated that different homogeneous bacteria were  
268 numerically dominant in all three MBRs individually, whose numbers were high enough to affect the  
269 performance of the reactor as a single strain. The numerically dominant bacteria in A farm were the  
270 homogeneous *Arthrobacter* genotype and the homogeneous *Burkholderia* genotype (AB299593)  
271 (Table 1a, 1b), while those in B had the homogeneous *Alphaproteobacteria* genotype (Table 2a, 2b),  
272 and those in C had the homogeneous *Betaproteobacteria* genotype (Table 3), which occupied a  
273 higher ratio among the detected bacteria (Table 6). This finding could be obtained by the  
274 differentiation and elimination of low-abundance bacterial groups having huge diversity shown as  
275 smeared bands in the DGGE profiles (Fig. 3, Fig.4).

276 The present results also indicated that the method was effective to demonstrate the population  
277 dynamics of unknown bacterial groups without cultivation, as the following. In the MBR of A farm,  
278 the number of the numerically dominant *Arthrobacter* genotype increased 230 times, and a number  
279 of the *Microbacterium* genotype increased to become the subdominant strain, while the other  
280 numerically dominant *Burkholderia* genotype disappeared during 13 months (Table 4), when the  
281 performance of the MBR recovered to normal condition from serious damage by a large effluent of



282 waste milk. In the MBR of B farm, the number of the numerically dominant *Alphaproteobacteria*  
283 genotype ( $24 \times 10^5$  MPN) slightly decreased to  $15.5 \times 10^5$  MPN, the number of those of the  
284 *Haloanaerobacter chitinovorans* genotype increased after 12 days (Table 5). Our present results  
285 clearly demonstrated a dynamic transition of microbial composition in an MBR that particular  
286 bacteria proliferated and became extinct.

287 Until now, most of the microbial research of CAS (18-22, 24-29, 31, 32), and MBR (23, 24, 30)  
288 has been focused on the exploration of microbial diversity using the conventional  
289 culture-independent molecular techniques with aim to cover almost all the low-abundance  
290 microorganisms. These approaches seemed to have targeted such bacterial groups as those that  
291 appeared as smeared bands in lower dilutions of DGGE profiles (Fig. 3, Fig.4), which seemed to be  
292 not suitable to specify and trace numerically dominant bacterial groups. Our method was simple but  
293 effective to clarify the dynamic transition of the numerically dominant unknown microbial group in  
294 bioreactors.

295

## 296 **ACKNOWLEDGMENTS**

297 All of the BMR samples were provided by BICOM Co. Ltd. (Osaka, Japan). We thank Mr. S.  
298 Senkawa, representative director of BICOM Co. Ltd. for sending us samples. We thank Prof.  
299 M.Sakai, and Assistant Prof. M. Ikenaga of the lab of soil science at Kagoshima University for

300 providing us with various advice, information, and suggestions about DGGE techniques. We thank  
301 Miss Y. Akahoshi, and Mr. T. Momoshima, undergraduate students, for analysis of the samples. We  
302 also thank Mr. Patrick Slusar of Fukuoka Institute of Technology for English proofreading.  
303 English.

304

### 305 REFERENCES

- 306 1. Layton AC, Karanth PN, Lajoie CA, Meyers AJ, Grefory IR, Stapleton RD, Taylor DE, Sayler  
307 GS. 2000. Quantification of *Hyphomicrobium* Populations in Activated Sludge from an  
308 Industrial Wastewater Treatment System as Determined by 16S rRNA Analysis. *Appl. Environ.*  
309 *Microbiol.* 66: 1167–1174.
- 310 2. Speirs L, Nittami T, McIlroy S, Schroeder S, Seviour R J. 2009. Filamentous Bacterium  
311 Eikelboom Type 0092 in Activated Sludge Plants in Australia Is a Member of the Phylum  
312 *Chloroflexi*. *Appl. Environ. Microbiol.* 75: 2446–2452.
- 313 3. Adrian L, Szewzyk U, Wecke J, Görisch H. 2000. Bacterial dehalorespiration with chlorinated  
314 benzenes. *Nature* 408: 580–583.
- 315 4. Pedrós-Alió C. 2012. The rare bacterial biosphere. *Ann. Rev. Mar. Sci.* 4: 449-466.
- 316 5. Sogin ML, Morrison HG, Huber JA, Welch DM, Huse SM, Neal PR, Arrieta JM, Herndl  
317 GJ. 2006. Microbial diversity in the deep sea and the underexplored “rare biosphere”. *Proc. Natl.*  
318 *Acad. Sci. U.S.A.* 103: 12115-12120.
- 319 6. Lleo` MM, Pierobon S, Tafi MC, Signoreto C, Canepari P. 2000. mRNA detection by reverse  
320 transcription-PCR for monitoring viability over time in an *Enterococcus faecalis* viable but  
321 nonculturable population maintained in a laboratory microcosm. *Appl. Environ. Microbiol.* 66:  
322 4564–4567.
- 323 7. Oliver JD. 2010. Recent findings on the viable but nonculturable state in pathogenic bacteria.  
324 *FEMS Microbiol. Rev.* 34:415–425.
- 325 8. Chen DMJ, Zhang X, Li A, Li Y, Wang Y. 2007. Retention of virulence in a viable but  
326 nonculturable *Edwardsiella tarda* isolate. *Appl. Environ. Microbiol.* 73: 1349–1354.
- 327 9. Quir´os C, Herrero M, Garcia LA, Diaz M. 2009. Quantitative approach to determining the  
328 contribution of viable-but nonculturable subpopulations of malolactic fermentation processes.  
329 *Appl. Environ. Microbiol.* 75: 2977–2981.
- 330 10. Sachidanandham R, Gin KYH. 2009. A dormancy state in nonspore-forming bacteria. *Appl*

- 331 Microbiol Biotec. 81:927–941.
- 332 11. Prakasam TBS, Dondero NC. 1967. Aerobic Heterotrophic Bacterial Populations of Sewage  
333 and Activated Sludge I. Enumeration' Appl. Environ. Microbiol. 15:461-467.
- 334 12. Dias FF, Bhat JV. 1964. Microbial Ecology of Activated Sludge I. Dominant Bacteria Appl  
335 Environ Microb, 12(5):412-417.
- 336 13. Rappé MS, Giovannoni SJ. 2003. The Uncultured Microbial Majority. Annu. Rev. Microbiol.  
337 2003. 57:369–94.
- 338 14. Fierera N, Leffeb JW, Adams BJ, Nielsend UN, Batesb ST, Lauberb CL, Owense S, Gilberte J,  
339 Wallh DH, Caporasoe JG. 2012. Cross-biome metagenomic analyses of soil microbial  
340 communities and their functional attributes. Proc. Natl. Acad. Sci. U.S.A.109:21390–213951.
- 341 15. Narihiro, T. 2016. Microbes in the water infrastructure: underpinning our society. Microbes  
342 Environ. 31:89–92.
- 343 16. Hiraishi, A. 1999. Distribution of viable but non-culturable bacteria in wastewater treatment  
344 systems. Microbes Environ. 14:91-99. (In Japanese).
- 345 17. Kamagata, Y. 2007. What are uncultured Microbe? J. Environ. Biotech. 7:69-73 (In  
346 Japanese).
- 347 18. Snaidr J, Amann R, Huber I., Ludwig W, Schleifer KH. 1997. Phylogenetic Analysis and In Situ  
348 Identification of Bacteria in Activated Sludge. Appl. Environ. Microbiol. 62:2884–2896.
- 349 19. Piterina AV, Pembroke JT. 2013. Use of PCR-DGGE Based Molecular Methods to Analyse  
350 Microbial Community Diversity and Stability during the Thermophilic Stages of an ATAD  
351 Wastewater Sludge Treatment Process as an Aid to Performance Monitoring. ISRN Biotech.  
352 2013: 162645.
- 353 20. Hanada A, Kurogi T, Giang NM, Yamada T, Kamimoto Y, Kiso Y, Hiraishi A. 2014. Bacteria  
354 of the Candidate Phylum TM7 are Prevalent in Acidophilic Nitrifying Sequencing-Batch  
355 Reactors. Microbes Environ. 29: 353-362.
- 356 21. Saikaly PE, Stroot PG, Oerther DB. 2005. Use of 16S rRNA Gene Terminal Restriction  
357 Fragment Analysis to Assess the Impact of Solids Retention Time on the Bacterial Diversity of  
358 Activated Sludge. Appl. Environ. Microbiol. 71:814–5822. t-RFLP AEM 5814 2005
- 359 22. V.-Vargas A, T.-Labrador G, M.l-Deya AA 2012. Bacterial Community Dynamics in Full-Scale  
360 Activated Sludge Bioreactors: Operational and Ecological Factors Driving Community  
361 Assembly and Performance PLoS One 7:e42524.
- 362 23. Takeda K, Hashimoto K, Soda S, Ike M, Yamashita K, Hashimoto T. 2014. Characterization of  
363 Microbial Community in Membrane Bioreactors Treating Domestic Wastewater. J. Water  
364 Environ. Tec. 12:99-107.
- 365 24. Silva AF, Carvalho G, Oehmen A, L.-Ferreira M, van Nieuwenhuijzen A, Reis MAM., Teresa

- 366 M, Crespo B. 2012. Microbial population analysis of nutrient removal-related organisms in  
367 membrane bioreactors. *Appl. Microbiol. Biotechnol.* 93:2171-2180.
- 368 25. Lenaerts J, Lappin-Scott HM, Porter J. 2007. Improved Fluorescent In Situ Hybridization  
369 Method for Detection of Bacteria from Activated Sludge and River Water by Using DNA  
370 Molecular Beacons and Flow Cytometry. *Appl. Environ. Microbiol.* 73:2020–2023.
- 371 26. Xia S, Duan L, Song Y, Li J, Andersen GL, Alvarez -Cohen L, Moreno-Andrade I, Huang CL,  
372 Hermanowicz S. 2010. Bacterial Community Structure in Geographically Distributed Biological  
373 Wastewater Treatment Reactors. *Environ. Sci. Technol.* 44:7391–7396.
- 374 27. Zhang T, Shao MF, Ye L. 2012. 454 Pyrosequencing reveals bacterial diversity of activated  
375 sludge from 14 sewage treatment plants. *The ISME Journal* 6:1137–1147.
- 376 28. Wang X., Hu M, Xia Y, Wen X, Ding K. 2012. Pyrosequencing Analysis of Bacterial Diversity  
377 in 14 Wastewater Treatment Systems in China. *Appl. Environ. Microbiol.* 78:7042–7047.
- 378 29. Ibarbalz FM, Orellana E, Figuerola ELM, Erijman L. 2016. Shotgun Metagenomic Profiles  
379 Have a High Capacity To Discriminate Samples of Activated Sludge According to Wastewater  
380 Type. *Appl. Environ. Microbiol.* 82:5186-5196.
- 381 30. Sato Y, Hori T, Navarro RR, Naganawa R, Habe H, Ogata A. 2016. Effects of  
382 Organic-Loading-Rate Reduction on Sludge Biomass and Microbial Community in a  
383 Deteriorated Pilot-Scale Membrane Bioreactor. *Microbes Environ.* 31:361-364.
- 384 31. Narihiro T, Nobu MK, Hori T, Aoyagi T, Sato Y, Inaba T, Aizawa H, Tamaki H, Habe H. 2019.  
385 Effects of the Wastewater Flow Rate on Interactions between the Genus *Nitrosomonas* and  
386 Diverse Populations in an Activated Sludge Microbiome. *Microbes Environ.* 34:89-94.
- 387 32. Xia S, Duan L, Song Y, Li J, Piceno YM, Andersen GL, A.-Cohen L, M-Andrade I,  
388 Sanapareddy N, Hamp TJ, Gonzalez LC, Hilger HA, Fodor AA, Clinton SM. 2009. Molecular  
389 Diversity of a North Carolina Wastewater Treatment Plant as Revealed by Pyrosequencing.  
390 *Appl. Environ. Microbiol.* 75:1688–1696.
- 391 33. Dionisi HM, Harms G, Layton AC, Gregory IR, Parker J, Hawkins SA, Robinson KG, Saylor  
392 GS. 2003. Power Analysis for Real-Time PCR Quantification of Genes in Activated Sludge and  
393 Analysis of the Variability Introduced by DNA Extraction. *Appl. Environ. Microbiol.* 69:6597–  
394 6604.
- 395 34. Baptista JDC, Lunn M, Davenport RJ, Swan DL, Read LF, Brown MR, Morais C, Curtisa TP.  
396 2014. Agreement between *amoA* Gene-Specific Quantitative PCR and Fluorescence *In Situ*  
397 Hybridization in the Measurement of Ammonia-Oxidizing Bacteria in Activated Sludge. *Appl.*  
398 *Environ. Microbiol.* 80: 5901–5910.
- 399 35. Nguyen VL, He X, de los Reyes III FL. 2016. Quantifying in situ growth rate of a filamentous  
400 bacterial species in activated sludge using rRNA:rDNA ratio. *FEMS. Microbiol. Letters.*

- 401 363:fnw255.
- 402 36. Watanabe K, Okuda M, Koga N. 2008. Newly developed system based on multiple enzyme  
403 restriction fragment length polymorphism-an application to proteolytic bacterial flora analysis,  
404 Soil Sci.Plant Nutr. 54:2, 204-215
- 405 37. Watanabe K, Koga N. 2009. Use of a Microchip Electrophoresis System for Estimation of  
406 Bacterial Phylogeny and Analysis of NO<sup>3</sup> Reducing Bacterial Flora in Field Soils. Biosci.  
407 Biotech. Biochem. **73**:479-488.
- 408 38. Watanabe K, Horinishi N, Matumoto K, 2015. Antibiotic-Resistant Bacterial Group in Field Soil  
409 Evaluated by a Newly Developed Method Based on Restriction Fragment Length Polymorphism  
410 Analysis. Adv. Microbiol. **5**:807-816.
- 411 39. Watanabe K, Horinishi N, Matumoto K, Tanaka A, Yakushido K. 2015. Bacterial Groups  
412 Concerned with Maturing Process in Manure Production Analyzed by a Method Based on  
413 Restriction Fragment Length Polymorphism Analysis. Adv. Microbiol. **5**:832-841.
- 414 40. Watanabe K, Horinishi N, Matumoto K, Sogabe Y. 2016. Identification and Enumeration  
415 Method of both Eukaryotic and Prokaryotic Microorganisms in Food Sample. Food Nutr. Sci.  
416 **7**: 345-354.
- 417 41. Horinishi N, Matumoto K, Watanabe K. 2016. A Simple Evaluation System for Microbial  
418 Property in Soil and Manure. Adv. Microbiol. **6**: 88-97.
- 419 42. Matumoto K, Shimada K, Horinishi,N, Watanabe K. 2016. Evaluation of the method based on  
420 restriction fragment length polymorphism analysis as simple analysis method of lactic acid  
421 bacteria in foods. Food Nutr. Sci. **7**: 163-172.
- 422 43. Watanabe K, Horinishi N, Matsumoto K, Tanaka A, Yakushido K. 2016. A new evaluation  
423 method for antibiotic-resistant bacterial groups in environment. Adv. Microbiol. **6**:133-151.
- 424 44. Weidner S, Arnold W, Puhler A. 1996. Diversity of Uncultured Microorganisms Associated  
425 with the Seagrass *Halophila stipulacea* Estimated by Restriction Fragment Length  
426 Polymorphism Analysis of PCR-Amplified 16S rRNAGenes. Appl. Environ.Microbiol.  
427 **62**:766-771.
- 428 45. Cole JR, Chai B, Farris RJ, Wang Q, Kulam-Syed-Mohideen AS, McGarrell DM, Bandela AM,  
429 Cardenas E, Garrity GM, Tiedje JM. 2007. The Ribosomal Database Project (RDP-II):  
430 Introducing myRDP Space and Quality Controlled Public Data. Nucleic Acids Res.  
431 **35**:D169-D172.
- 432 46. Nei M, Li WH. 1979. Mathematical Model for Studying Genetic Variation in Terms of  
433 Restriction Endonucleases. Proc. Natl. Acad. Sci. U.S.A. **76**:269-5273.
- 434 47. Blodgett R. 2010. FDA, Bacterial Analytical Manual, Appendix 2: Most Probable Number from  
435 Serial Dilutions.

- 436 <http://www.fda.gov/Food/FoodScienceResearch/LaboratoryMethods/ucm109656.htm>
- 437 48. Haas CN. 1989. Estimation of Microbial Densities from Dilution Count Experiments. Appl.  
438 Environ. Microbiol. 55:1934-1942.
- 439 49. Nubel U, Engelen B, Felske A, Snaird J, Wieshuver A, Amann RI, Ludwig W, Backhaous H.  
440 1996. Sequence Heterogeneities of Genes Encoding 16S rRNAs in *Paenibacillus polymyxa*  
441 Detected by Temperature Gradient Gel Electrophoresis J. Bacteriol. 178: 5636–5643.
- 442 50. Heuer H, Krsek M, Baker P, Smalla K, Wellington EH.. 1997. Analysis of Actinomycete  
443 Communities by Specific Amplification of Genes Encoding 16S rRNA and Gel-Electrophoretic  
444 Separation in Denaturing Gradients. Appl. Environ. Microbiol. 63:3233–3241.
- 445 51. Morimoto S, Hoshino Y. 2008. Methods for analysis of soil communities by PCR-DGGE (1)  
446 bacterial and fungal communities. Soil Microorg. 62:63-68.

447

448

449 **Figure legends**

450 Figure 1. Electropherograms of RFLP (*Hh* I) of serial 10-fold dilutions ( $10^{-3}$ - $10^{-9}$ ) in the MBR for C  
451 farm on 9/October/2015.

452

453 Figure 2. Ratios of bacterial groups estimated by MPN for the tested three MBRs.

454 Capital letters indicate the results of culture-independent MPN as the following: A1, A2

455 were in the MBR for A farm on 6/August/2014, and 24/October/2015, B1 and B2 were the MBR

456 for A farm on 18/ August /2014 and 30/August/2014, and C was the MBR for C farm on

457 9/October/2015. Small letters indicate the results of culture-based MPN as the following,

458 a1 was in the MBR for A farm on 6/August/2014, b1 was the MBR for B farm on 18/ August

459 /2014, and c was in that for C farm on 9/October/2015. Ratio of Actinobacteria

460 (□), Firmicutes (▣),  $\alpha$ -Proteobacteria (▤),  $\beta$ -Proteobacteria (▥),  $\gamma$ -Proteobacteria (▦),

461  $\delta$ -Proteobacteria (▧),  $\epsilon$ -Proteobacteria (▨), Other bacteria (▩), unidentified bacteria (▪).

462

463 Figure 3. DGGE profiles of serial 10-fold dilutions ( $10^{-2}$ - $10^{-5}$ ) in the MBR for A farm on

464 6/August/2014.

465

466 Figure 4. DGGE profiles of serial 10-fold dilutions ( $10^{-4}$ - $10^{-8}$ ) in the MBR for A farm on

467 24/October/2015.

468





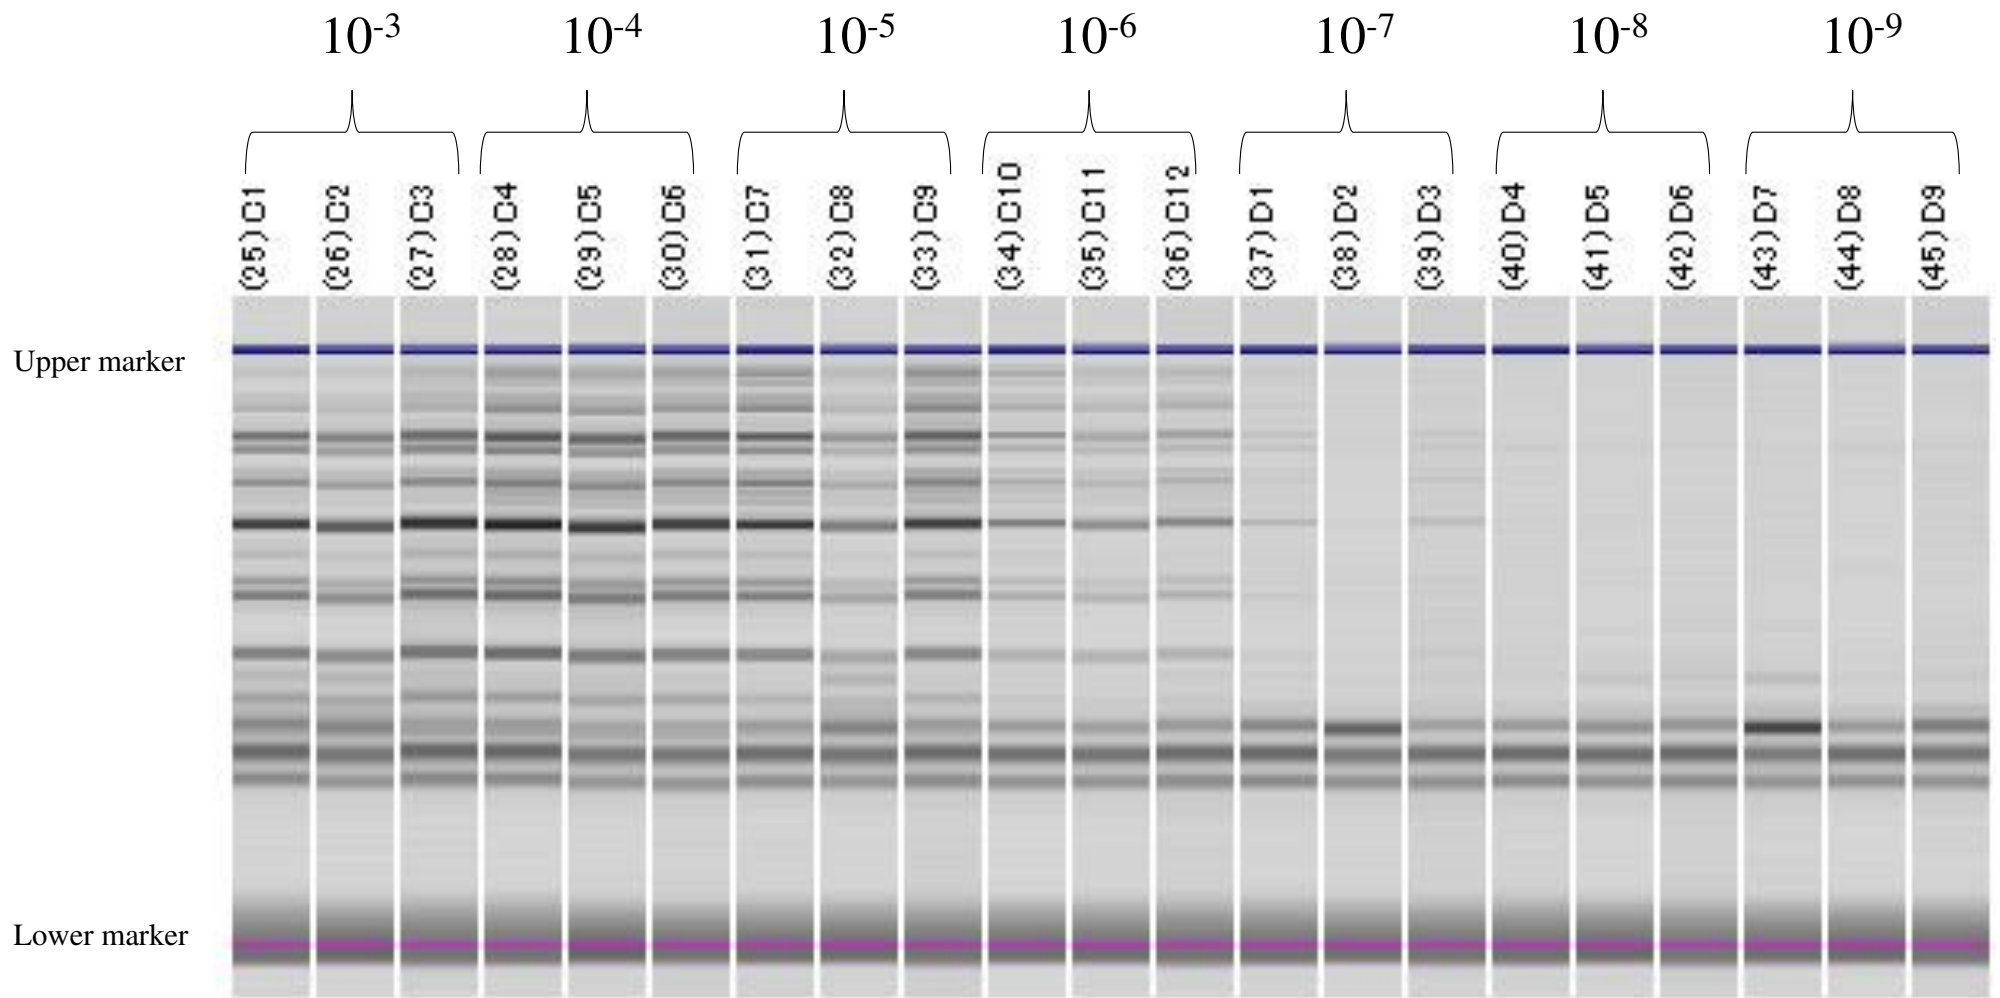

Figure 1.

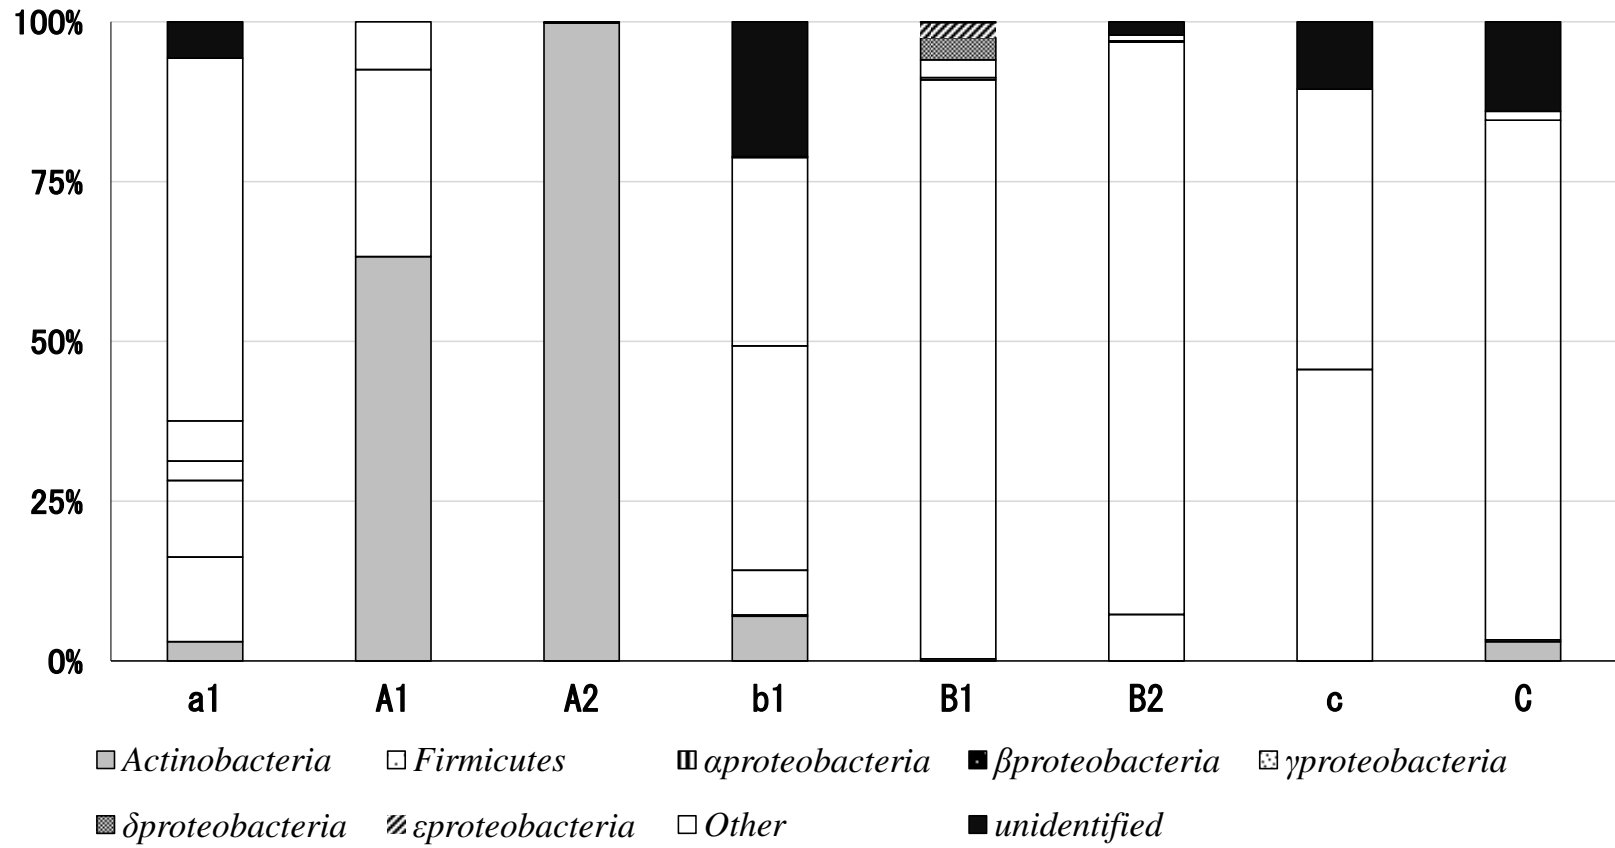

Figure 2.

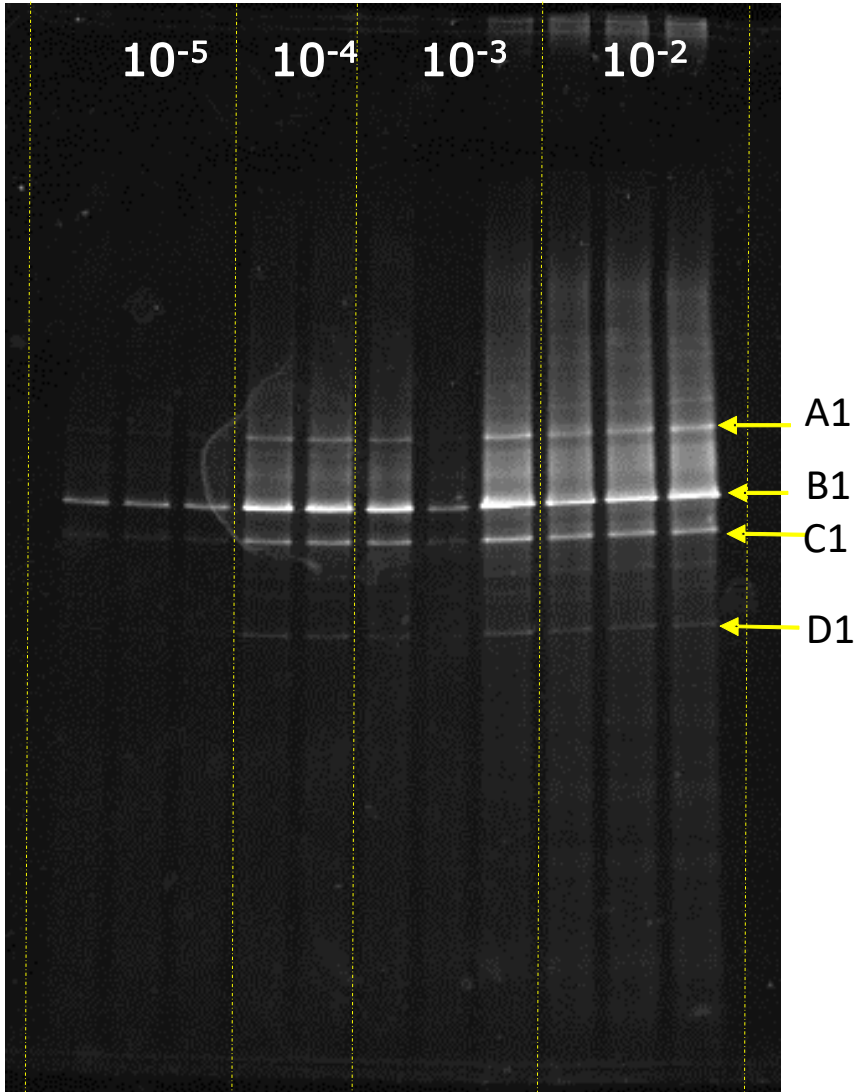

Figure 3.

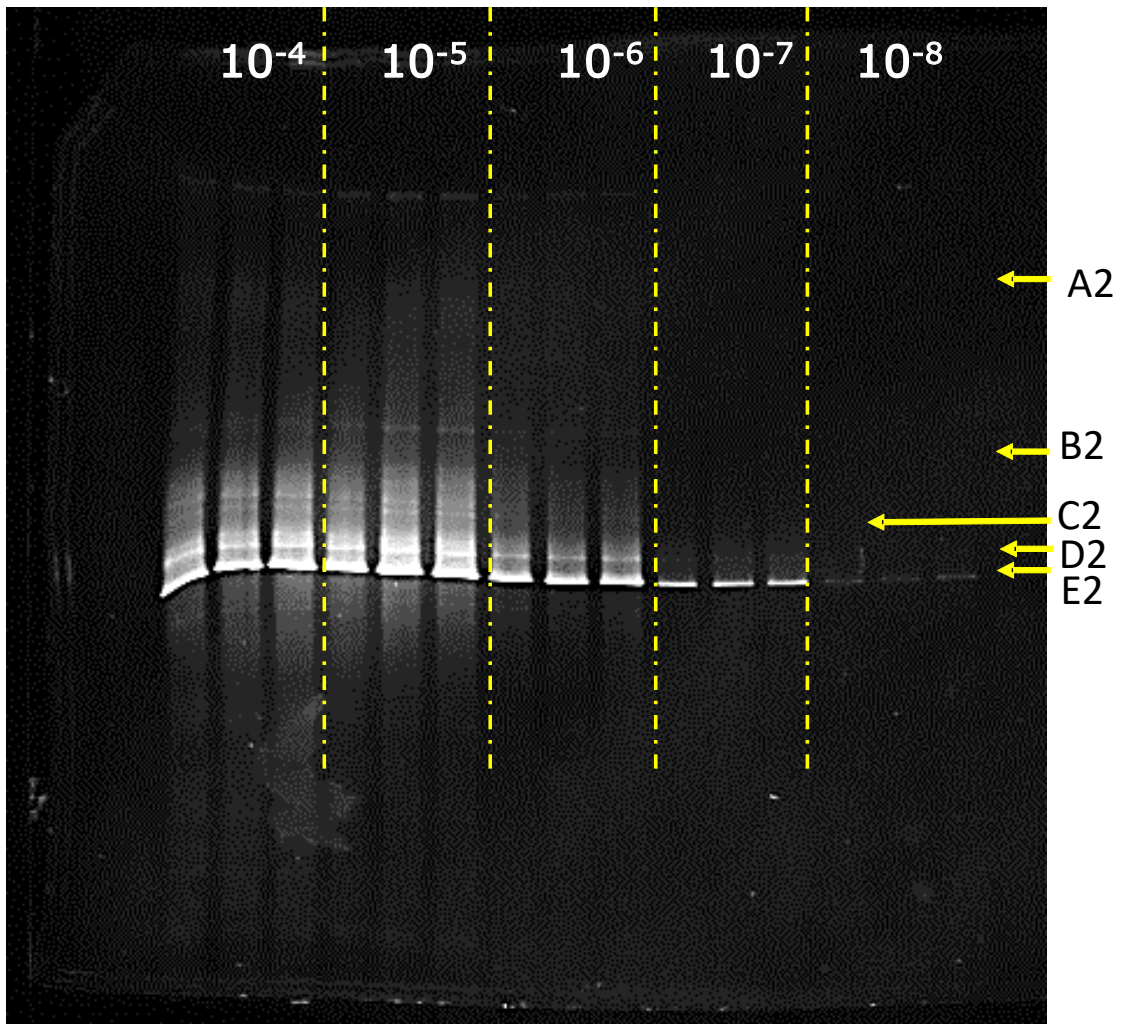

Figure 4.

Table 1. Affiliation<sup>a</sup> of bacteria in serially diluted DNA extract of MBR in A farm on 6/August/2014 (A1) and on 24/October/2015 (A2) by MERFLP (culture-independent MPN).

| <b>A1</b> | Vial No. <sup>b</sup>   | Restriction enzymes <sup>c</sup> | Similarity (%) | Name (Accession number) <sup>d</sup>                                                                                       |
|-----------|-------------------------|----------------------------------|----------------|----------------------------------------------------------------------------------------------------------------------------|
|           | A110 <sup>-2</sup> -2H  | A,Ha,Hh                          | 100            |                                                                                                                            |
|           | A110 <sup>-2</sup> -3H  | A,Ha,Hh                          | 100            |                                                                                                                            |
|           | A110 <sup>-3</sup> -1H  | A,Ha,Hh                          | 100            |                                                                                                                            |
|           | A110 <sup>-3</sup> -2H  | A,Ha,Hh                          | 100            |                                                                                                                            |
|           | A110 <sup>-3</sup> -3H  | A,Ha,Hh                          | 100            | <i>Arthrobacter</i> sp.(AF197047)                                                                                          |
| A         | A110 <sup>-4</sup> -1H  | A,Ha,Hh                          | 100            |                                                                                                                            |
|           | A110 <sup>-4</sup> -2H  | A,Ha,Hh                          | 100            |                                                                                                                            |
|           | A110 <sup>-4</sup> -3H  | A,Ha,Hh                          | 100            |                                                                                                                            |
|           | A110 <sup>-5</sup> -3H  | A,Ha,Hh                          | 100            |                                                                                                                            |
|           | A110 <sup>-2</sup> -1H  | A,R,Hh                           | 91.7           | <i>Streptomyces badius</i> (AY999783), <i>S.lavendulae</i> (D85110, D85111)                                                |
|           | A110 <sup>-5</sup> -2H  | A,R                              | 100            | <i>Micromonospora carbonacea</i> (Mms.carbo2, Mmscarbon), <i>M.chalcea</i> (Mms.chalc2), <i>M.echinospora</i> (Mms echns2) |
|           | A110 <sup>-2</sup> -1MA | A,Ha,                            | 93             |                                                                                                                            |
|           | A110 <sup>-2</sup> -2MA | A,Ha,                            | 93             |                                                                                                                            |
|           | A110 <sup>-2</sup> -3MA | A,Ha,                            | 93             |                                                                                                                            |
|           | A110 <sup>-3</sup> -1MA | A,Ha,                            | 93             |                                                                                                                            |
| βP        | A110 <sup>-3</sup> -2MA | A,Ha,                            | 93             | <i>Burkholderia</i> sp.(AB299593)                                                                                          |
|           | A110 <sup>-3</sup> -3MA | A,Ha,                            | 93             |                                                                                                                            |
|           | A110 <sup>-4</sup> -1MA | A,Ha,                            | 93             |                                                                                                                            |
|           | A110 <sup>-4</sup> -2MA | A,Ha,                            | 93             |                                                                                                                            |
|           | A110 <sup>-4</sup> -3MA | A,Ha,                            | 93             |                                                                                                                            |
| γP        | A110 <sup>-5</sup> -1H  | A,R,Hh                           | 93.3           | <i>Cedecea neteri</i> (AB086230)                                                                                           |

| <b>A2</b> | Vial No. <sup>b</sup>  | Restriction enzymes <sup>c</sup> | Similarity (%) | Name (Accession number) <sup>d</sup>                                                                                                |
|-----------|------------------------|----------------------------------|----------------|-------------------------------------------------------------------------------------------------------------------------------------|
|           | A210 <sup>-3</sup> -1H | A,Ha,Hh                          | 91.7           |                                                                                                                                     |
|           | A210 <sup>-3</sup> -2H | A,Ha,Hh                          | 100            |                                                                                                                                     |
|           | A210 <sup>-3</sup> -3H | A,Ha,Hh                          | 91.7           |                                                                                                                                     |
|           | A210 <sup>-4</sup> -1H | A,Ha,Hh                          | 100            |                                                                                                                                     |
|           | A210 <sup>-4</sup> -2H | A,Ha,Hh                          | 100            |                                                                                                                                     |
|           | A210 <sup>-4</sup> -3H | A,Ha,Hh                          | 91.7           |                                                                                                                                     |
|           | A210 <sup>-5</sup> -1H | A,Ha,Hh                          | 91.7           |                                                                                                                                     |
|           | A210 <sup>-5</sup> -2H | A,Ha,Hh                          | 91.7           | <i>Arthrobacter</i> sp.(AF197047,AF197044,AM11056,AM491459)                                                                         |
|           | A210 <sup>-5</sup> -3H | A,Ha,Hh                          | 91.7           |                                                                                                                                     |
|           | A210 <sup>-6</sup> -1H | A,Ha,Hh                          | 91.7           |                                                                                                                                     |
| A         | A210 <sup>-6</sup> -2H | A,Ha,Hh                          | 91.7           |                                                                                                                                     |
|           | A210 <sup>-6</sup> -3H | A,Ha,Hh                          | 91.7           |                                                                                                                                     |
|           | A210 <sup>-7</sup> -1H | A,Ha                             | 100            |                                                                                                                                     |
|           | A210 <sup>-7</sup> -3H | A,Ha,Hh                          | 91.7           |                                                                                                                                     |
|           | A210 <sup>-3</sup> -1M | Ha,Hh                            | 100            |                                                                                                                                     |
|           | A210 <sup>-3</sup> -3M | Ha,Hh                            | 100            | <i>Microbacterium</i> sp.(AM403628)                                                                                                 |
|           | A210 <sup>-6</sup> -3M | Ha,Hh                            | 100            |                                                                                                                                     |
|           | A210 <sup>-6</sup> -2M | Ha,Hh                            | 100            | <i>Microbacterium lavaniforman</i> (D21344)                                                                                         |
|           | A210 <sup>-4</sup> -1M | Ha,Hh                            | 100            | <i>Cellulosimicrobium</i> sp.(AB188217), <i>Streptomyces shandongensis</i> (AY875718), <i>Promicromonospora enterophil</i> (X83807) |
|           | A210 <sup>-7</sup> -2H | R,Hh                             | 90             | <i>Streptomyces cirratus</i> (AY944265), <i>S.lavendulae</i> (Stm.lave12)                                                           |
|           | A210 <sup>-3</sup> -2L | A,Hh                             | 93             |                                                                                                                                     |
| F         | A210 <sup>-3</sup> -3L | A,Hh                             | 93             | <i>Lactobacillus reuteri</i> (L23507, L.reuteri)                                                                                    |
|           | A210 <sup>-5</sup> -2L | A,Hh                             | 93             | <i>Eubacterium</i> sp.(Eub.W 1365), uncultured <i>Buleidia</i> sp.(AM420006)                                                        |
| αP        | A210 <sup>-3</sup> -1L | A,R                              | 100            | <i>Leisingera methylohalidivorans</i> (AY005463)                                                                                    |
|           | A210 <sup>-3</sup> -2M | A,Ha                             | 94.4           | uncultured <i>Gammaproteobacteria</i> (AY354844)                                                                                    |
|           | A210 <sup>-4</sup> -3M | A,Ha                             | 94.4           | <i>Photobacterium profundum</i> (CR378673)                                                                                          |
| γP        | A210 <sup>-4</sup> -2M | A,Ha                             | 94.4           |                                                                                                                                     |
|           | A210 <sup>-5</sup> -1M | A,Ha                             | 94.4           | uncultured <i>Gammaproteobacteria</i> (AJ704665)                                                                                    |
|           | A210 <sup>-5</sup> -2M | A,Ha                             | 94.4           |                                                                                                                                     |
|           | A210 <sup>-5</sup> -3M | A,Ha                             | 94.4           | <i>Citrobacter</i> sp.(DQ190736)                                                                                                    |

<sup>a</sup> Grouping was based on affiliation by MERFLP; *Actinobacteria* (A), *Firmicutes* (F), *Alphaproteobacteria* (αP), *Betaproteobacteria* (βP), *Gammaproteobacteria* (γP), *Deltaproteobacteria* (δP), *Epsilonproteobacteria* (εP), the other bacteria (O), and unidentified or uncultured bacterial group (no).

<sup>b</sup> Exponential of vial number represents the decimal dilution of the vial. The 2nd number of vial number (1-3) represents number in 3 replicates for the each decimal dilution. "H" of last letter represents MERFLP originating from the major 16S rDNA, "M" represents from the 2nd major 16S rDNA, and "L" represents from the 3rd major 16S rDNA.

<sup>c</sup> Restriction enzymes used for similarity search; "Ha", "R", and "Hh" stand for *Hae* III, *Rsa* I, and *Hha* I. For the measured MERFLP, which had no completely identical theoretical MERFLP, the theoretical MERFLP having the highest similarity using all the RFLPs, was presented with the similarity as described in the materials and method.

<sup>d</sup> Species name (accession number) of the theoretical MERFLP having the highest similarity with the measured MERFLP

Table 2. Affiliation<sup>a</sup> of bacteria in serially diluted DNA extract of MBR in B farm on 18/August/2014 (B2) and on 30/August/2014 (B2) by MERFLP (culture-independent MPN).

| <b>B1</b> | Vial No. <sup>b</sup>  | Restriction enzymes <sup>c</sup> | Similarity (%) | Name (Accession number) <sup>d</sup>                                                                                                                                                                                                                                                 |
|-----------|------------------------|----------------------------------|----------------|--------------------------------------------------------------------------------------------------------------------------------------------------------------------------------------------------------------------------------------------------------------------------------------|
| A         | B110 <sup>-3</sup> -2L | Ha,Hh                            | 0.1            | <i>Actinotelluria brasiliensis</i> (DQ029102)                                                                                                                                                                                                                                        |
|           | B110 <sup>-3</sup> -3L | Ha,Hh                            | 93             | uncultured actinobacterium(AJ575510,AJ575514)                                                                                                                                                                                                                                        |
| αP        | B110 <sup>-3</sup> -1H | R,Hh                             | 100            |                                                                                                                                                                                                                                                                                      |
|           | B110 <sup>-3</sup> -3H | R,Hh                             | 100            |                                                                                                                                                                                                                                                                                      |
|           | B110 <sup>-4</sup> -1H | R,Hh                             | 100            | <i>Ensifer fredii</i> (D14516), <i>E.meliloti</i> (D14509), <i>E. medicae</i> (CP000738), <i>Shinorhizobium fredii</i> (Srh.fredi5), <i>S. meliloti</i> (Srh.meli17), <i>Mesorhizobium tianshanense</i> (Mso.tians2), <i>M. loti</i> (BA000012), <i>Agrobacterium vitis</i> (D12795) |
|           | B110 <sup>-4</sup> -2H | R,Hh                             | 100            |                                                                                                                                                                                                                                                                                      |
|           | B110 <sup>-4</sup> -3H | R,Hh                             | 100            |                                                                                                                                                                                                                                                                                      |
|           | B110 <sup>-5</sup> -1H | R,Hh                             | 100            |                                                                                                                                                                                                                                                                                      |
|           | B110 <sup>-5</sup> -2H | R,Hh                             | 100            |                                                                                                                                                                                                                                                                                      |
|           | B110 <sup>-5</sup> -3H | R,Hh                             | 100            |                                                                                                                                                                                                                                                                                      |
| βP        | B110 <sup>-3</sup> -2H | Ha,Hh                            | 100            | <i>Aquaspirillum peregrinum</i> (AB074521)                                                                                                                                                                                                                                           |
|           | B110 <sup>-3</sup> -3M | A,Hh                             | 90             | <i>Neisseria elongata</i> (Nis,elong2)                                                                                                                                                                                                                                               |
| γP        | B110 <sup>-3</sup> -1M | A,Hh                             | 90             | <i>Vibrio shilonii</i> (AY911395), <i>V.harveyi</i> (AY911396), <i>V.alginolyticus</i> (V.alginol3), <i>Neisseria elongata</i> (Nis,elong2)                                                                                                                                          |
|           | B110 <sup>-4</sup> -3M | A,Hh                             | 90             |                                                                                                                                                                                                                                                                                      |
|           | B110 <sup>-5</sup> -2M | A,Hh                             | 90             | <i>Escherichia coli</i> (E.colirnB3,E.colirnC3,E.colirnD3), <i>Shigella dysenteriae</i> (X96966)                                                                                                                                                                                     |
| δP        | B110 <sup>-4</sup> -1M | A,Hh                             | 93             | uncultured <i>Deltaproteobacterium</i> (AJ581352)                                                                                                                                                                                                                                    |
|           | B110 <sup>-4</sup> -2M | A,R                              | 90             | <i>Deltaproteobacterium</i> (AY162123)                                                                                                                                                                                                                                               |
| εP        | B110 <sup>-5</sup> -1M | Ha,Hh                            | 90             | uncultured <i>Epsilonproteobacterium</i> (AB013262, AB015535)                                                                                                                                                                                                                        |
|           | B110 <sup>-5</sup> -3M | Ha,Hh                            | 90             |                                                                                                                                                                                                                                                                                      |
| O         | B110 <sup>-3</sup> -2L | R,Hh                             | 90             | <i>Treponema</i> sp.(AF182834,AF182837)                                                                                                                                                                                                                                              |

| <b>B2</b> | Vial No. <sup>b</sup>  | Restriction enzymes <sup>c</sup> | Similarity (%) | Name (Accession number) <sup>d</sup>                                                                        |
|-----------|------------------------|----------------------------------|----------------|-------------------------------------------------------------------------------------------------------------|
| F         | B210 <sup>-3</sup> -2M | R,Hh                             | 90             |                                                                                                             |
|           | B210 <sup>-4</sup> -1M | R,Hh                             | 90             | <i>Haloanaerobacter chitinovorans</i> (U32596)                                                              |
|           | B210 <sup>-5</sup> -3M | R,Hh                             | 90             |                                                                                                             |
| αP        | B210 <sup>-1</sup> -1H | A,R,Hh                           | 96.3           |                                                                                                             |
|           | B210 <sup>-1</sup> -2H | A,R,Hh                           | 96.3           |                                                                                                             |
|           | B210 <sup>-1</sup> -3H | A,R,Hh                           | 96.3           |                                                                                                             |
|           | B210 <sup>-2</sup> -1H | A,R,Hh                           | 96.3           |                                                                                                             |
|           | B210 <sup>-2</sup> -2H | A,R,Hh                           | 96.3           |                                                                                                             |
|           | B210 <sup>-2</sup> -3H | A,R,Hh                           | 96.3           | <i>Ensifer fredii</i> (AB195268), <i>E.medicae</i> (CP000738), <i>Shinorhizobium</i> sp.(AF227755,AB195268) |
|           | B210 <sup>-3</sup> -1H | A,R,Hh                           | 96.3           |                                                                                                             |
|           | B210 <sup>-3</sup> -3H | A,R,Hh                           | 96.3           |                                                                                                             |
|           | B210 <sup>-4</sup> -1H | A,R,Hh                           | 95.2           |                                                                                                             |
|           | B210 <sup>-4</sup> -3H | A,R,Hh                           | 96.3           |                                                                                                             |
|           | B210 <sup>-5</sup> -2H | A,R,Hh                           | 96.3           |                                                                                                             |
|           | B210 <sup>-5</sup> -3H | A,R,Hh                           | 96.3           |                                                                                                             |
| βP        | B210 <sup>-3</sup> -2H | Ha,Hh                            | 100            | <i>Aquaspirillum peregrinum</i> (AB074521)                                                                  |
|           | B210 <sup>-1</sup> -1M | R,Hh                             | 90             |                                                                                                             |
|           | B210 <sup>-1</sup> -2M | R,Hh                             | 90             |                                                                                                             |
|           | B210 <sup>-1</sup> -3M | R,Hh                             | 90             |                                                                                                             |
|           | B210 <sup>-2</sup> -1M | R,Hh                             | 90             |                                                                                                             |
|           | B210 <sup>-2</sup> -2M | R,Hh                             | 90             | uncultured bacterium (AB186826, AB186827, AB186829)                                                         |
|           | B210 <sup>-2</sup> -3M | R,Hh                             | 90             |                                                                                                             |
|           | B210 <sup>-3</sup> -1M | R,Hh                             | 90             |                                                                                                             |
|           | B210 <sup>-3</sup> -3M | R,Hh                             | 90             |                                                                                                             |
|           | B210 <sup>-4</sup> -3M | R,Hh                             | 90             |                                                                                                             |
|           | B210 <sup>-1</sup> -1L | R,Hh                             | 90             |                                                                                                             |
|           | B210 <sup>-1</sup> -2L | R,Hh                             | 90             |                                                                                                             |
|           | B210 <sup>-2</sup> -3L | R,Hh                             | 90             | uncultured bacterium(DQ154841)                                                                              |
|           | B210 <sup>-3</sup> -3L | R,Hh                             | 90             |                                                                                                             |
|           | B210 <sup>-4</sup> -3L | R,Hh                             | 90             |                                                                                                             |

<sup>a</sup> Grouping was the same as described in Table 1.

<sup>b</sup> Vial number was the same as described in Table 1.

<sup>c</sup> Restriction enzymes used for similarity search as described in Table 1.

<sup>d</sup> Species name (accession number) was the same as described in Table 1.

Table 3. Affiliation<sup>a</sup> of bacteria in serially diluted DNA extract of MBR in C farm 9/October/2015 by MERFLP (culture-independent MPN).

|                       | Vial No. <sup>b</sup> | Restriction enzymes <sup>c</sup> | Similarity (%)                                  | Name (Accession number) <sup>d</sup>                                                                     |
|-----------------------|-----------------------|----------------------------------|-------------------------------------------------|----------------------------------------------------------------------------------------------------------|
| A                     | C10 <sup>-3</sup> -1L | R,Hh                             | 100                                             | <i>Mycobacteriaceae</i> bacterium (AB298730), <i>Propionibacteriaceae</i> bacterium (AB298731)           |
|                       | C10 <sup>-4</sup> -1L | R,Hh                             | 100                                             |                                                                                                          |
|                       | C10 <sup>-5</sup> -1L | R,Hh                             | 100                                             |                                                                                                          |
|                       | C10 <sup>-6</sup> -2L | R,Hh                             | 100                                             |                                                                                                          |
|                       | C10 <sup>-6</sup> -1M | Ha,Hh                            | 90                                              |                                                                                                          |
|                       | C10 <sup>-6</sup> -2M | Ha,Hh                            | 90                                              |                                                                                                          |
| F                     | C10 <sup>-3</sup> -2H | Ha,R                             | 100                                             | uncultured <i>Eubacterium</i> (AY356378,AY356789,AY356381,AY356382)                                      |
|                       | C10 <sup>-3</sup> -3L | R,Hh                             | 100                                             | <i>Lactobacillus fermentum</i> (M58809, M58819, DQ208931, L.Fermentm), <i>L.bifermentum</i> (L.bifermen) |
|                       | C10 <sup>-4</sup> -2L | R,Hh                             | 100                                             |                                                                                                          |
|                       | C10 <sup>-4</sup> -3L | R,Hh                             | 100                                             |                                                                                                          |
|                       | C10 <sup>-5</sup> -3L | R,Hh                             | 100                                             |                                                                                                          |
| C10 <sup>-3</sup> -1H | Ha,R                  | 100                              | uncultured <i>Betaproteobacteria</i> (AY921864) |                                                                                                          |
| C10 <sup>-3</sup> -3H | Ha,R                  | 100                              |                                                 |                                                                                                          |
| C10 <sup>-4</sup> -1H | Ha,R                  | 100                              |                                                 |                                                                                                          |
| C10 <sup>-4</sup> -3H | Ha,R                  | 100                              |                                                 |                                                                                                          |
| C10 <sup>-5</sup> -1H | Ha,R                  | 100                              |                                                 |                                                                                                          |
| C10 <sup>-5</sup> -3H | Ha,R                  | 100                              |                                                 |                                                                                                          |
| C10 <sup>-6</sup> -1H | Ha,R                  | 100                              |                                                 |                                                                                                          |
| C10 <sup>-6</sup> -2H | Ha,R                  | 100                              |                                                 |                                                                                                          |
| C10 <sup>-6</sup> -3H | Ha,R                  | 100                              |                                                 |                                                                                                          |
| C10 <sup>-7</sup> -1H | Ha,R                  | 100                              |                                                 |                                                                                                          |
| O                     | C10 <sup>-3</sup> -1M | Ha,R                             | 90                                              | <i>Aquiflexum balticum</i> (AJ744861)                                                                    |
|                       | C10 <sup>-4</sup> -2H | Ha,R                             | 100                                             | uncultured <i>Chloroflexi</i> bacteria(AY921893)                                                         |
|                       | C10 <sup>-5</sup> -2H | Ha,R                             | 100                                             | uncultured <i>Cytophaga</i> sp.(AB015265)                                                                |
|                       | C10 <sup>-6</sup> -1M | Ha,R                             | 90                                              |                                                                                                          |
| C10 <sup>-3</sup> -2M | Ha,Hh                 | 100                              | uncultured bacterium(AY942753,AY942754)         |                                                                                                          |
| C10 <sup>-5</sup> -1M | Ha,Hh                 | 100                              |                                                 |                                                                                                          |
| C10 <sup>-5</sup> -3M | Ha,Hh                 | 100                              |                                                 |                                                                                                          |
| C10 <sup>-4</sup> -2M | A,Ha                  | 100                              | uncultured bacterium(AY375083)                  |                                                                                                          |
| C10 <sup>-6</sup> -3L | R,Hh                  | 100                              | uncultured prokaryote(AM268745)                 |                                                                                                          |
| C10 <sup>-7</sup> -1L | R,Hh                  | 100                              |                                                 |                                                                                                          |

<sup>a</sup> Grouping was the same as described in Table 1.

<sup>b</sup> Vial number was the same as described in Table 1.

<sup>c</sup> Restriction enzymes used for similarity search as described in Table 1.

<sup>d</sup> Species name (accession number) were the same as described in Table 1.



Table 4. Most probable numbers of the numbers of each group in the MBE in A farm on 6/August/2014 by culture-based MPN (a1), on 6/August /2014 (A1) and on 24/October /2015 (A2) by culture-independent MPN and 5% confidence limits obtained using the FDA's Bacterial Analytical Manual (47, 48).

\*Under estimated MPN number due to an absence of MPN dilution vials higher than  $10^{-9}$ .

|                           | a1 (culture-based MPN)                             |       |                         |                   | A1 (culture-independent MPN)                       |       |                                |             | A2 (culture-independent MPN)                       |       |                         |                    |
|---------------------------|----------------------------------------------------|-------|-------------------------|-------------------|----------------------------------------------------|-------|--------------------------------|-------------|----------------------------------------------------|-------|-------------------------|--------------------|
|                           | Three dilutions                                    | Score | x10 <sup>6</sup> MPN/mL | 5%limits Low-High | Three dilutions                                    | Score | x10 <sup>4</sup> MPN/mL limits | 5% Low-High | Three dilutions                                    | Score | x10 <sup>6</sup> MPN/mL | 5% limits Low-High |
| <i>Actinobacteria</i>     | 10 <sup>-7</sup> 10 <sup>-8</sup> 10 <sup>-9</sup> | 0-0-1 | 30                      | 1.5-96            | 10 <sup>-4</sup> 10 <sup>-5</sup> 10 <sup>-6</sup> | 3-2-0 | 93                             | 18-420      | 10 <sup>-6</sup> 10 <sup>-7</sup> 10 <sup>-8</sup> | 3-3-0 | 240                     | 42-1000            |
| <i>Arthrobacter</i> sp.   |                                                    |       |                         |                   | 10 <sup>-4</sup> 10 <sup>-5</sup> 10 <sup>-6</sup> | 3-1-0 | 43                             | 9-180       | 10 <sup>-6</sup> 10 <sup>-7</sup> 10 <sup>-8</sup> |       | 93                      | 18-420             |
| <i>Microbacterium</i> sp. |                                                    |       |                         |                   |                                                    |       |                                |             | 10 <sup>-6</sup> 10 <sup>-7</sup> 10 <sup>-8</sup> |       | 9.2                     | 1.4-38             |
| <i>Firmicutes</i>         | 10 <sup>-7</sup> 10 <sup>-8</sup> 10 <sup>-9</sup> | 2-0-1 | 140                     | 36-420            |                                                    |       |                                |             | 10 <sup>-3</sup> 10 <sup>-4</sup> 10 <sup>-5</sup> | 2-0-1 | 0.01                    | 0.004-0.042        |
| <i>αproteobacteria</i>    | 10 <sup>-5</sup> 10 <sup>-6</sup> 10 <sup>-7</sup> | 2-0-0 | 0.92                    | 0.14-3.8          |                                                    |       |                                |             | 10 <sup>-3</sup> 10 <sup>-4</sup> 10 <sup>-5</sup> | 1-0-0 | 0.004                   | 0.00002-0.018      |
| <i>βproteobacteria</i>    | 10 <sup>-7</sup> 10 <sup>-8</sup> 10 <sup>-9</sup> | 0-1-0 | 30                      | 1.5-90            | 10 <sup>-4</sup> 10 <sup>-5</sup> 10 <sup>-6</sup> | 3-1-0 | 43                             | 9-180       |                                                    |       |                         |                    |
| <i>Burkholderia</i> sp.   |                                                    |       |                         |                   | 10 <sup>-4</sup> 10 <sup>-5</sup> 10 <sup>-6</sup> | 3-1-0 | 43                             | 9-180       |                                                    |       |                         |                    |
| <i>γproteobacteria</i>    | 10 <sup>-7</sup> 10 <sup>-8</sup> 10 <sup>-9</sup> | 1-1-0 | 74                      | 13-200            | 10 <sup>-4</sup> 10 <sup>-5</sup> 10 <sup>-6</sup> | 0-1-0 | 11                             | 0.15-11     | 10 <sup>-4</sup> 10 <sup>-5</sup> 10 <sup>-6</sup> | 2-3-0 | 0.29                    | 0.09-0.94          |
| <i>δproteobacteria</i>    |                                                    |       |                         |                   |                                                    |       |                                |             |                                                    |       |                         |                    |
| <i>εproteobacteria</i>    |                                                    |       |                         |                   |                                                    |       |                                |             |                                                    |       |                         |                    |
| Other                     | 10 <sup>-7</sup> 10 <sup>-8</sup> 10 <sup>-9</sup> | 3-1-0 | 430                     | 90-1800           |                                                    |       |                                |             |                                                    |       |                         |                    |
| unidentified              | 10 <sup>-4</sup> 10 <sup>-5</sup> 10 <sup>-6</sup> | 1-0-0 | 0.04                    | 0.002-0.18        |                                                    |       |                                |             |                                                    |       |                         |                    |
| Total number              | 10 <sup>-7</sup> 10 <sup>-8</sup> 10 <sup>-9</sup> | 3-3-3 | >11,000*                | 420-              | 10 <sup>-4</sup> 10 <sup>-5</sup> 10 <sup>-6</sup> | 3-3-0 | 240                            | 42-1000     | 10 <sup>-6</sup> 10 <sup>-7</sup> 10 <sup>-8</sup> | 3-3-0 | 240                     | 42-1000            |

Table 5. Most probable numbers of the numbers of each group in the MBE in B farm on 18/August/2014 by culture-based MPN (b1), on 18/August/2014 (B1) and on 30/August/2014 (B2) by culture-independent MPN and 5% confidence limits obtained using the FDA's Bacterial Analytical Manual (47, 48).

\*We could not calculate 5% confidence limits because of the lack a  $10^5$  dilution sample, and a  $10^6$  dilution sample.

|                               | b1 (culture-based MPN)                             |       |                         |                       | B1 (culture-independent MPN)                       |       |                         |                       | B2 (culture-independent MPN)                       |       |                         |                       |
|-------------------------------|----------------------------------------------------|-------|-------------------------|-----------------------|----------------------------------------------------|-------|-------------------------|-----------------------|----------------------------------------------------|-------|-------------------------|-----------------------|
|                               | Three dilutions                                    | Score | x10 <sup>6</sup> MPN/mL | 5% limits<br>Low-High | Three dilutions                                    | Score | x10 <sup>4</sup> MPN/mL | 5% limits<br>Low-High | Three dilutions                                    | Score | x10 <sup>6</sup> MPN/mL | 5% limits<br>Low-High |
| <i>Actinobacteria</i>         | 10 <sup>-7</sup> 10 <sup>-8</sup> 10 <sup>-9</sup> | 0-0-1 | 30                      | 1.5-96                | 10 <sup>-3</sup> 10 <sup>-4</sup> 10 <sup>-5</sup> | 2-0-0 | 0.92                    | 10.14-3.8             |                                                    |       |                         |                       |
| <i>Firmicutes</i>             | 10 <sup>-5</sup> 10 <sup>-6</sup> 10 <sup>-7</sup> | 1-0-1 | 0.72                    | 0.13-1.8              |                                                    |       |                         |                       | 10 <sup>-4</sup> 10 <sup>-5</sup> 10 <sup>-6</sup> | 1-1-0 | 12.6                    | 2.4-41                |
| <i>H.chitinovorans</i>        |                                                    |       |                         |                       |                                                    |       |                         |                       | 10 <sup>-4</sup> 10 <sup>-5</sup> 10 <sup>-6</sup> | 1-1-0 | 12.6                    | 2.4-41                |
| <i>αproteobacteria</i>        | 10 <sup>-7</sup> 10 <sup>-8</sup> 10 <sup>-9</sup> | 0-1-0 | 30                      | 1.5-300               | 10 <sup>-4</sup> 10 <sup>-5</sup> 10 <sup>-6</sup> | 3-3-0 | 240                     | 42-1000               | 10 <sup>-4</sup> 10 <sup>-5</sup> 10 <sup>-6</sup> | 2-2-0 | 155                     | *                     |
| <i>Ensifer/Shinorhizobium</i> |                                                    |       |                         |                       | 10 <sup>-4</sup> 10 <sup>-5</sup> 10 <sup>-6</sup> | 3-3-0 | 240                     | 42-1000               | 10 <sup>-4</sup> 10 <sup>-5</sup> 10 <sup>-6</sup> | 2-2-0 | 155                     | *                     |
| <i>βproteobacteria</i>        | 10 <sup>-7</sup> 10 <sup>-8</sup> 10 <sup>-9</sup> | 2-1-0 | 150                     | 37-420                | 10 <sup>-3</sup> 10 <sup>-4</sup> 10 <sup>-5</sup> | 2-0-0 | 0.92                    | 0.14-3.8              | 10 <sup>-3</sup> 10 <sup>-4</sup> 10 <sup>-5</sup> | 1-0-0 | 0.37                    | *                     |
| <i>γproteobacteria</i>        | 10 <sup>-7</sup> 10 <sup>-8</sup> 10 <sup>-9</sup> | 0-3-1 | 126                     | 37-265                | 10 <sup>-4</sup> 10 <sup>-5</sup> 10 <sup>-6</sup> | 1-1-0 | 7.4                     | 1.3-20                |                                                    |       |                         |                       |
| <i>δproteobacteria</i>        |                                                    |       |                         |                       | 10 <sup>-4</sup> 10 <sup>-5</sup> 10 <sup>-6</sup> | 2-0-0 | 9.2                     | 1.4-30                |                                                    |       |                         |                       |
| <i>εproteobacteria</i>        |                                                    |       |                         |                       | 10 <sup>-4</sup> 10 <sup>-5</sup> 10 <sup>-6</sup> | 0-2-0 | 6.2                     | 1.2-18                |                                                    |       |                         |                       |
| Other                         | 10 <sup>-5</sup> 10 <sup>-6</sup> 10 <sup>-7</sup> | 1-1-0 | 0.74                    | 0.13-2                | 10 <sup>-3</sup> 10 <sup>-4</sup> 10 <sup>-5</sup> | 0-1-0 | 0.36                    | 0.017-1.8             | 10 <sup>-3</sup> 10 <sup>-4</sup> 10 <sup>-5</sup> | 2-1-0 | 1.58                    | *                     |
| unidentified                  | 10 <sup>-7</sup> 10 <sup>-8</sup> 10 <sup>-9</sup> | 0-0-3 | 90                      | 32-808                |                                                    |       |                         |                       | 10 <sup>-3</sup> 10 <sup>-4</sup> 10 <sup>-5</sup> | 3-0-0 | 3.56                    | *                     |
| Total number                  | 10 <sup>-7</sup> 10 <sup>-8</sup> 10 <sup>-9</sup> | 3-3-1 | 4,600                   | 900-2000              | 10 <sup>-4</sup> 10 <sup>-5</sup> 10 <sup>-6</sup> | 3-3-1 | 460                     | 90-2000               | 10 <sup>-4</sup> 10 <sup>-5</sup> 10 <sup>-6</sup> | 3-3-0 | 240                     | 42-1000               |

Table 6. Most probable numbers of the numbers of each group in the MBE in farm C on 9/October/2015 by culture-based MPN (c), and by culture-independent MPN (C) and 5% confidence limits obtained using the FDA's Bacterial Analytical Manual (47, 48).

\*Under estimated MPN number due to an absence of MPN dilution vials higher than  $10^{-7}$ .

|                        | c (culture-based MPN)                           |       |                         |                   | C (culture-independent MPN)                     |       |                         |                   |
|------------------------|-------------------------------------------------|-------|-------------------------|-------------------|-------------------------------------------------|-------|-------------------------|-------------------|
|                        | Three dilutions                                 | Score | x10 <sup>6</sup> MPN/mL | 5%limits Low-High | Three dilutions                                 | Score | x10 <sup>6</sup> MPN/mL | 5%limits Low-High |
| <i>Actinobacteria</i>  |                                                 |       |                         |                   | 10 <sup>5</sup> 10 <sup>6</sup> 10 <sup>7</sup> | 1-3-0 | 1.6                     | 0.45-4.2          |
| Mycobacteriaceae       |                                                 |       |                         |                   | 10 <sup>5</sup> 10 <sup>6</sup> 10 <sup>7</sup> | 1-1-0 | 0.74                    | 0.13-2            |
| <i>S. baldacii</i>     |                                                 |       |                         |                   | 10 <sup>5</sup> 10 <sup>6</sup> 10 <sup>7</sup> | 0-2-0 | 0.62                    | 0.12-1.8          |
| <i>Firmicutes</i>      |                                                 |       |                         |                   | 10 <sup>4</sup> 10 <sup>5</sup> 10 <sup>6</sup> | 2-1-0 | 0.15                    | 0.037-0.42        |
| <i>L. fermentum</i>    |                                                 |       |                         |                   | 10 <sup>4</sup> 10 <sup>5</sup> 10 <sup>6</sup> | 2-1-0 | 0.15                    | 0.037-0.42        |
| <i>aproteobacteria</i> |                                                 |       |                         |                   |                                                 |       |                         |                   |
| βproteobacteria        | 10 <sup>5</sup> 10 <sup>6</sup> 10 <sup>7</sup> | 0-2-3 | >1.56*                  | 0.41-2.39         | 10 <sup>6</sup> 10 <sup>7</sup> 10 <sup>8</sup> | 3-1-0 | 43                      | 9-180             |
| AY921864               |                                                 |       |                         |                   | 10 <sup>6</sup> 10 <sup>7</sup> 10 <sup>8</sup> | 3-1-0 | 43                      | 9-180             |
| γproteobacteria        | 10 <sup>5</sup> 10 <sup>6</sup> 10 <sup>7</sup> | 2-1-0 | 1.5                     | 0.37-4.3          |                                                 |       |                         |                   |
| δproteobacteria        |                                                 |       |                         |                   |                                                 |       |                         |                   |
| εproteobacteria        |                                                 |       |                         |                   |                                                 |       |                         |                   |
| Other                  |                                                 |       |                         |                   | 10 <sup>5</sup> 10 <sup>6</sup> 10 <sup>7</sup> | 1-1-0 | 0.74                    | 0.13-2            |
| unidentified           | 10 <sup>5</sup> 10 <sup>6</sup> 10 <sup>7</sup> | 1-0-0 | 0.36                    | 0.017-1.8         | 10 <sup>6</sup> 10 <sup>7</sup> 10 <sup>8</sup> | 1-1-0 | 7.4                     | 1.3-20            |
| AM26874                |                                                 |       |                         |                   | 10 <sup>6</sup> 10 <sup>7</sup> 10 <sup>8</sup> | 1-1-0 | 7.4                     | 1.3-20            |
| Total number           | 10 <sup>5</sup> 10 <sup>6</sup> 10 <sup>7</sup> | 3-3-3 | >110*                   | 42-               | 10 <sup>6</sup> 10 <sup>7</sup> 10 <sup>8</sup> | 1-1-0 | 93                      | 18-420            |
